# Supplementary material for: Photothermal conversion assisted photocatalytic hydrogen evolution from amorphous carbon nitrogen nanosheets with nitrogen vacancies
Source: Royal Society of Chemistry journal article supplement (doi:10.1039/d0cp00132e), 2020-01-01
Supplement: d0cp00132e1.pdf [file d0cp00132e1.pdf]

## Supporting Information

### **Photothermal Conversion Assisted Photocatalytic Hydrogen Evolution from Amorphous Carbon Nitrogen Nanosheets with Nitrogen Vacancies**

*Bo Yan, Chun Du, Zhaoyong Lin, Guowei Yang\**

*State Key Laboratory of Optoelectronic Materials and Technologies, Nanotechnology  
Research Center, School of Materials Science & Engineering, Sun Yat-sen University,  
Guangzhou 510275, Guangdong, P. R. China*

\*Corresponding author: [stsygw@mail.sysu.edu.cn](mailto:stsygw@mail.sysu.edu.cn)

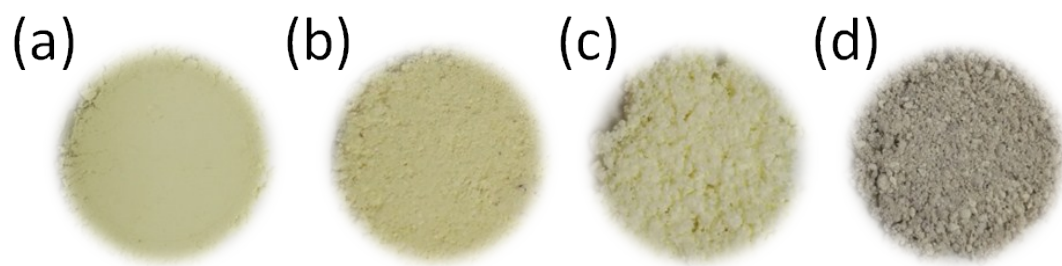

**Figure S1** The digital photographs of different samples. (a) BCN, (b) CNNS, (c) a-CN and (d) a-CNN.

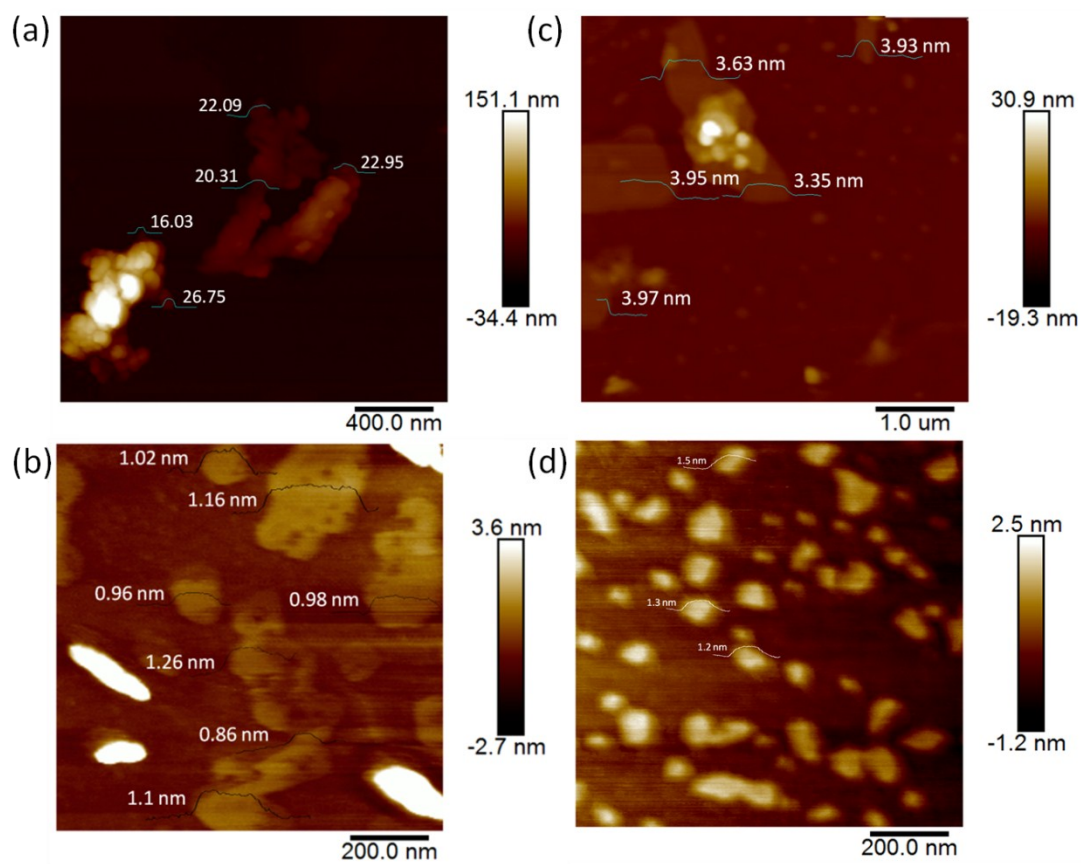

**Figure S2** AFM images of (a) BCN, (b) CNNS, (c) a-CN and (d) a-CNN.

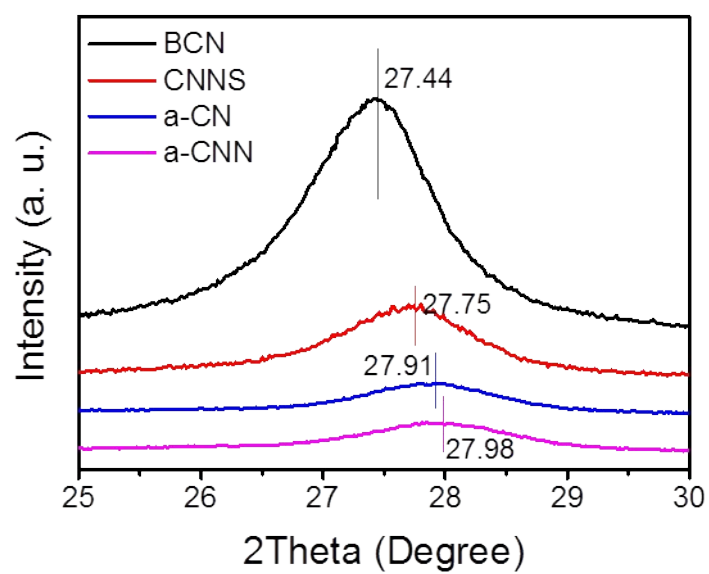

**Figure S3** XRD patterns of samples and (b) the enlargement of (a) in the range of 25° to 30°.

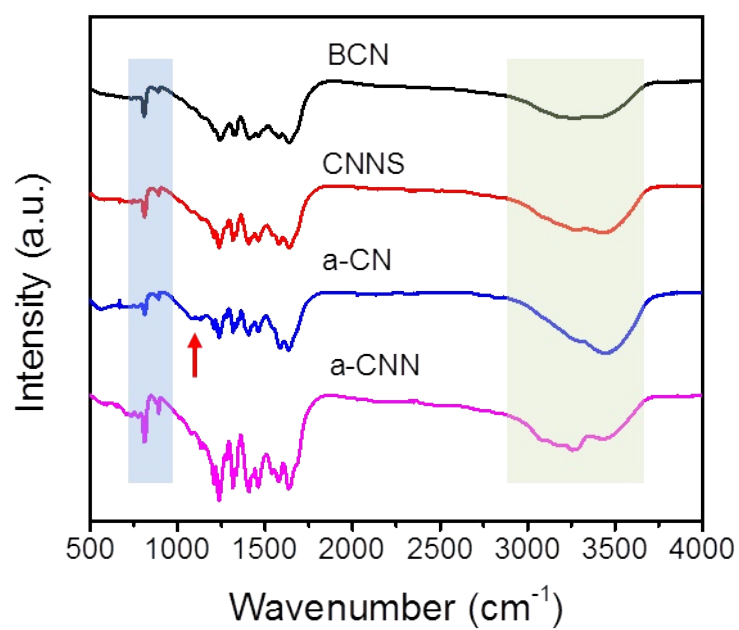

**Figure S4** FTIR spectra of samples.

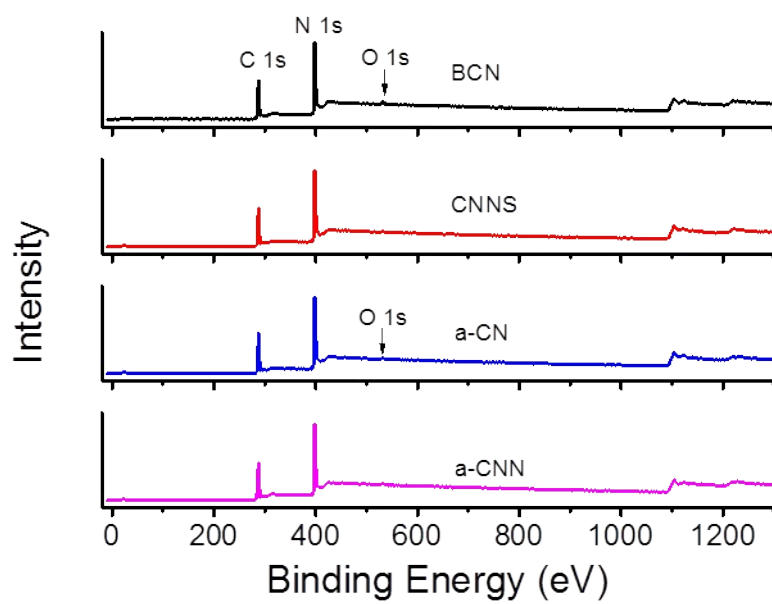

**Figure S5** XPS survey of samples.

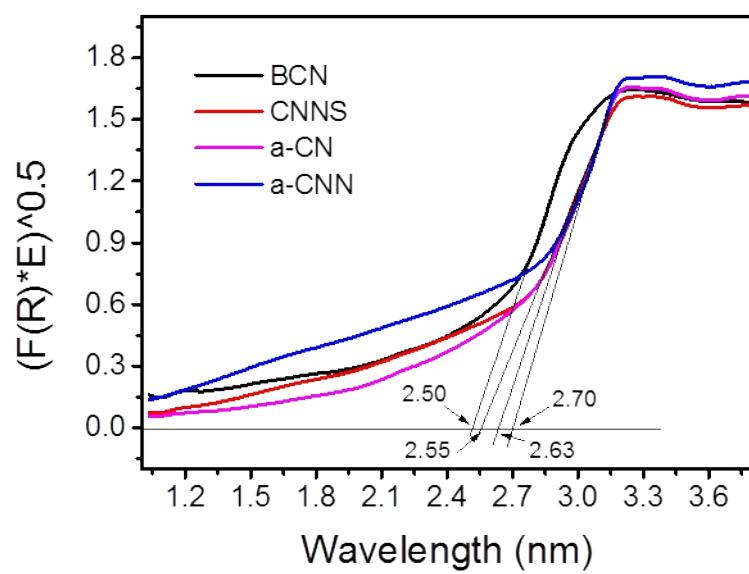

**Figure S6** Kubelka-Munk plot of samples resulted from Figure 3a.

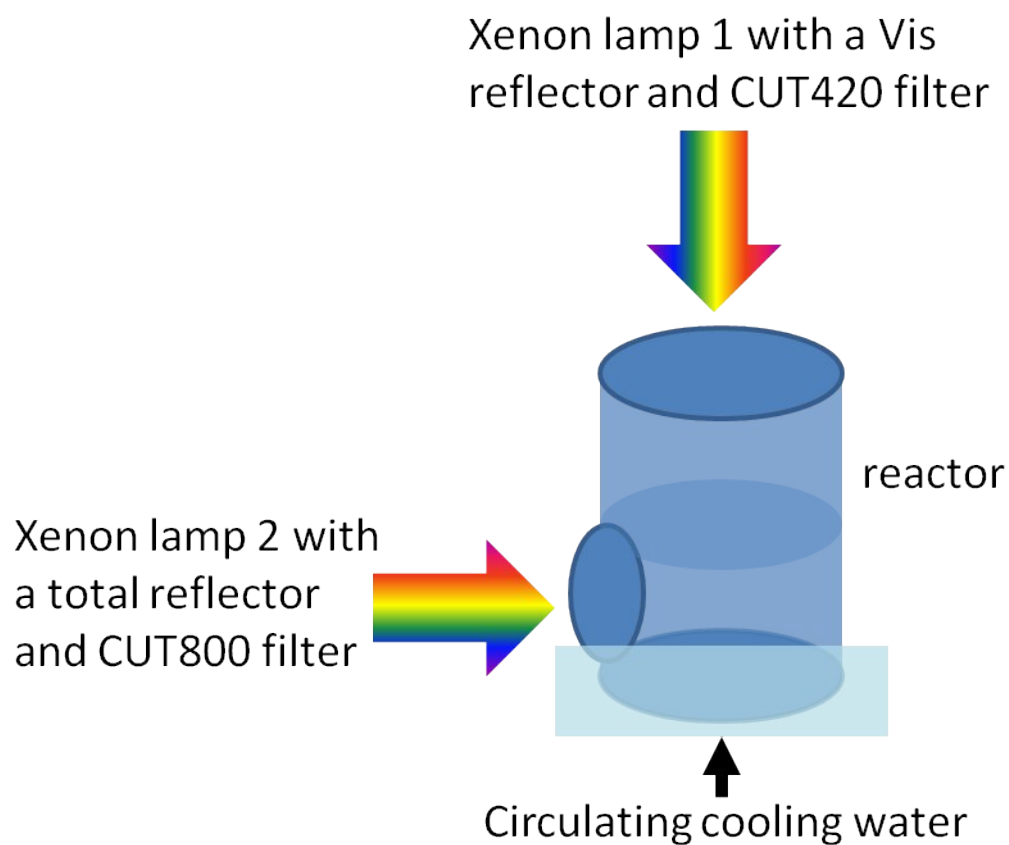

**Figure S7** The schemata of the experimental set-up for the Photocatalytic hydrogen evolution properties illuminated by dual Xenon lamp irradiation. Lamp 1 provides light covering Visible light range and lamp 2 with a CUT800 filter gives out NIR light.

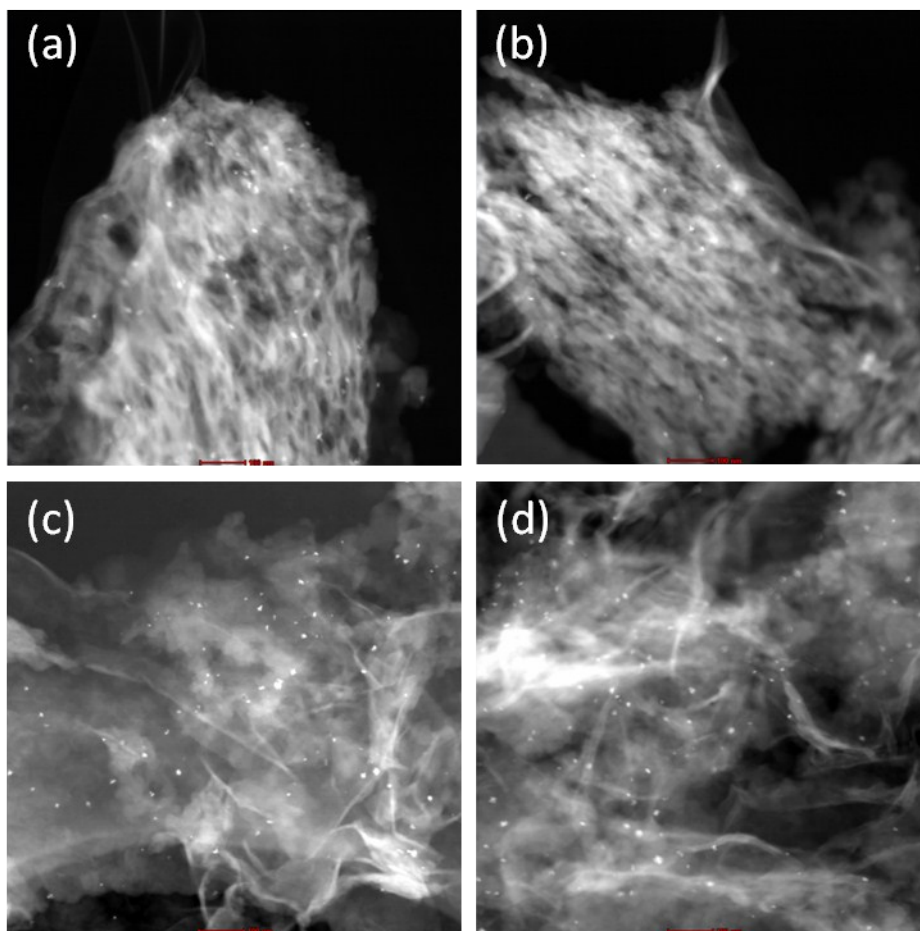

**Figure S8** High-Angle Annular Dark Field (Acquire HAADF Scanning) images of samples after photocatalytic reaction. The 3 wt% added Pt elements are distributed as cluster in samples.

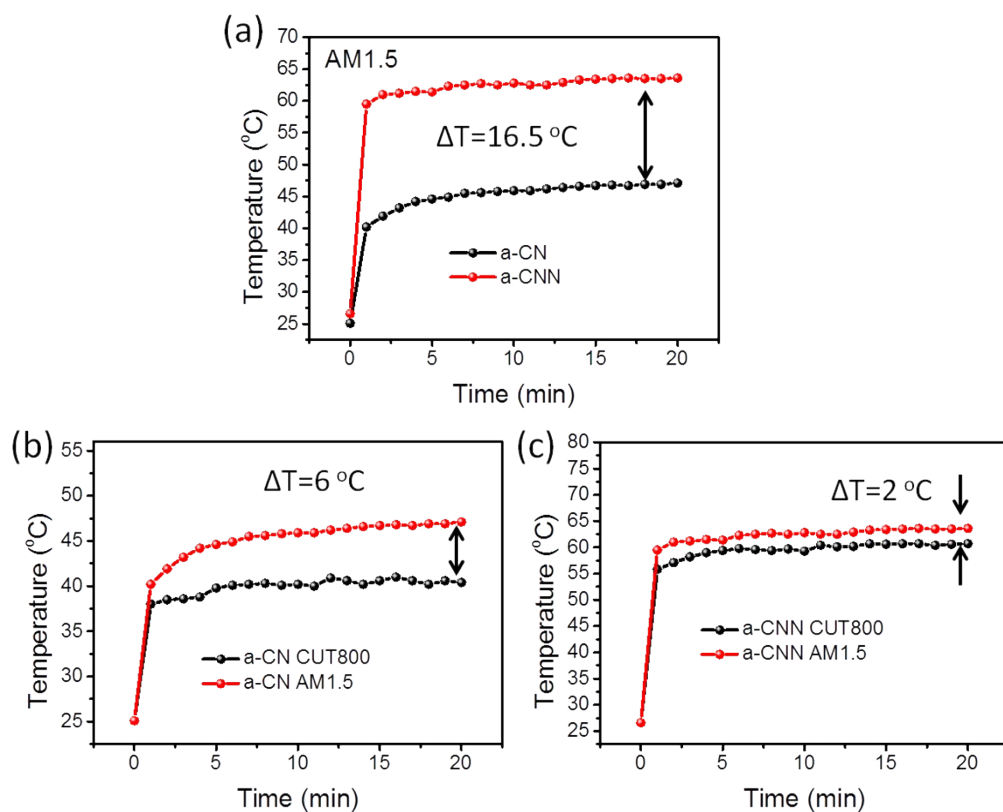

**Figure S9** Time-dependent temperature variation of a-CN and a-CNN under different light (Xenon lamb equipped with AM1.5 and CUT800 filter, all light intensity was fixed on 100 mW cm<sup>-2</sup>).

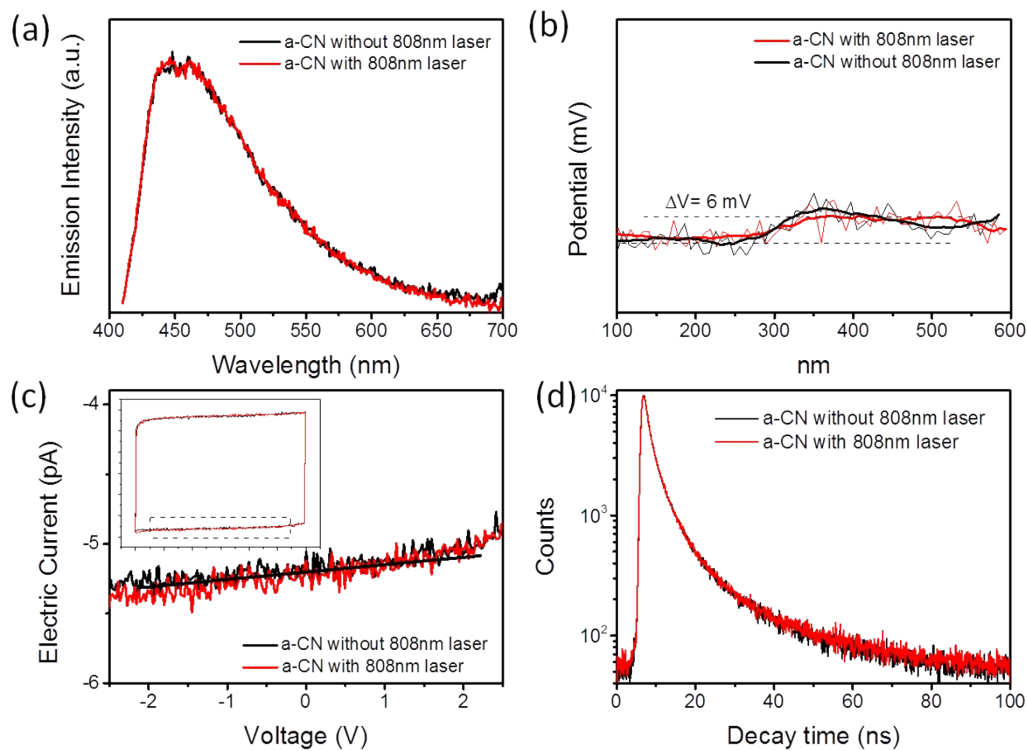

**Figure S10** (a) the PL spectra of a-CN with/without 808 nm laser irradiation, (b) the surface potential difference of the white line in Figure S15 (c) and (d) characterized by KPFM, (c) I-V curve of a-CN with/without 808 nm laser irradiation and (d) Ultrafast time-resolved spectroscopy of a-CN with/without 808 nm laser irradiation.

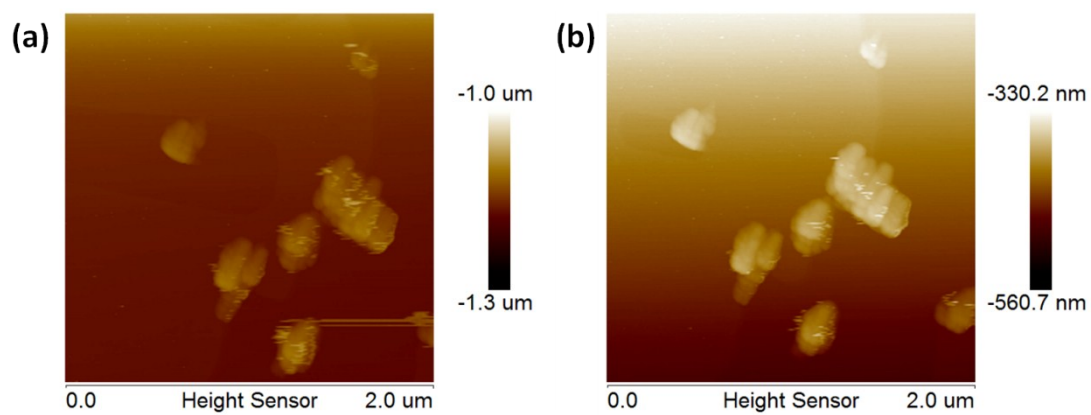

**Figure S11** The corresponding AFM images for Figure 5c and d, respectively.

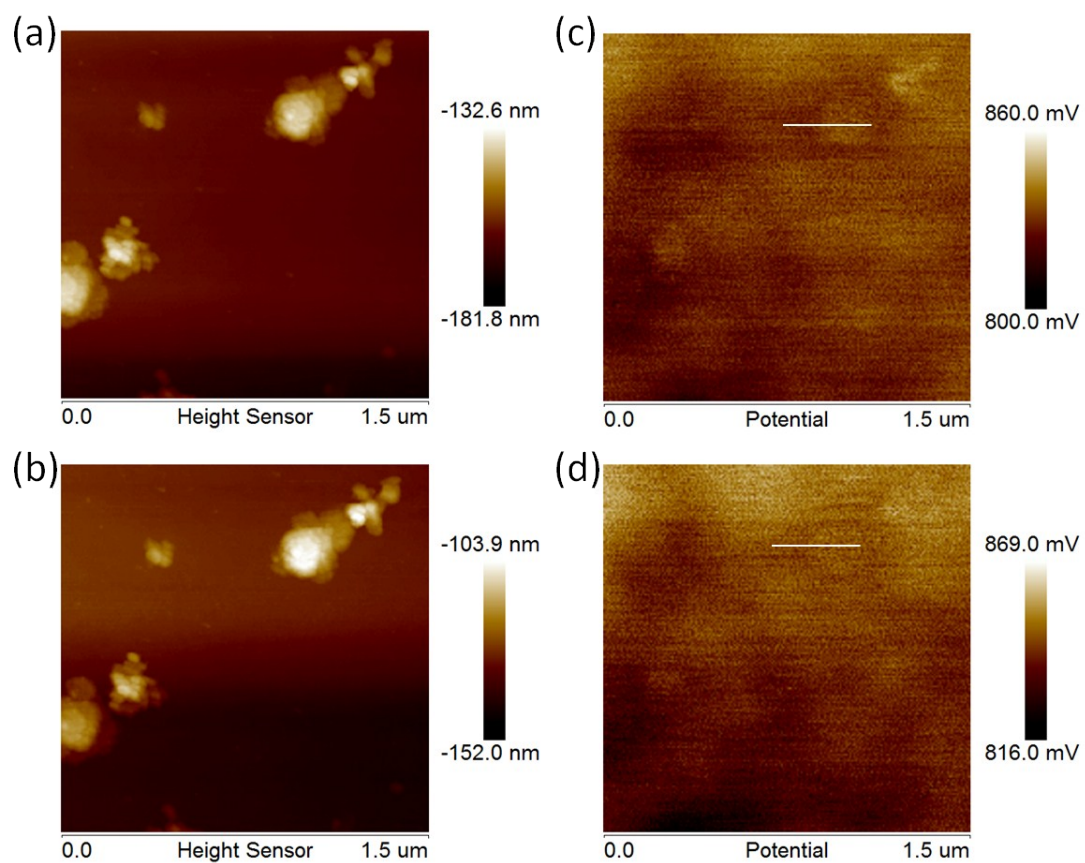

**Figure S12** The AFM images (a) and (b). (c) and (d) are the corresponding surface potential characterized by KPFM, respectively.
